# Supplementary material for: Smart design of wettability-patterned gradients on substrate-independent coated surfaces to control unidirectional spreading of droplets
Source: Royal Society of Chemistry journal article supplement (doi:10.1039/c6sm02864k), 2017-01-01
Supplement: c6sm02864k1.pdf [file c6sm02864k1.pdf]

## Supporting Information

### Smart Design of Wettability-Patterned Gradient on Substrate-Independent Coated Surfaces to Control Unidirectional Spreading of Droplet

Huaping Wu,<sup>\*a,c</sup> Kai Zhu,<sup>a</sup> Binbin Cao,<sup>a</sup> Zheng Zhang,<sup>a</sup> Bingbing Wu,<sup>a</sup> Lihua Liang,<sup>a</sup> Guozhong Chai<sup>a</sup> and Aiping Liu<sup>\*b</sup>

<sup>a</sup> *Key Laboratory of E&M (Zhejiang University of Technology), Ministry of Education & Zhejiang Province, Hangzhou 310014, China.*

<sup>b</sup> *Center for Optoelectronics Materials and Devices, Zhejiang Sci-Tech University, Hangzhou 310018, China.*

<sup>c</sup> *State Key Laboratory of Structural Analysis for Industrial Equipment, Dalian University of Technology, Dalian 116024, China*

## Table of context:

### Supplementary Analysis I:

**Figure S1.** Effect of TMOS concentration on water contact angle on glass substrate.

**Figure S2.** Effect of the number of spin coating on water contact angle on glass substrate.

**Figure S3.** Reaction mechanism during the modification of  $\text{TiO}_2$  with TMOS before and after UV irradiation.

**Table S1.** XPS analysis of TMOS- $\text{TiO}_2$  coating before and after UV irradiation for 30 minutes.

**Figure S4.** XPS spectra of (a) O 1s, (b) Si 2p, (c) Ti 2p and (d) C 1s for the TMOS- $\text{TiO}_2$  coatings before and after UV irradiation for 30 minutes.

**Figure S5.** XRD patterns of  $\text{TiO}_2$  and TMOS- $\text{TiO}_2$  coatings before and after UV irradiation for 30 minutes. (A: anatase; R: rutile).

**Figure S6.** Sliding angles of a droplet on the TMOS- $\text{TiO}_2$  coated (a) glass sheet ( $3^\circ$ ) and (b) dustlessness cloth ( $2.9^\circ$ ). (c) The adhesion of a droplet on the TMOS- $\text{TiO}_2$  coated filter paper was lower than on the glass sheet and dustlessness cloth. The droplet could be hardly deposited on a specific area of the filter paper and easily roll away due to weak adhesion. The water droplets were 10  $\mu\text{L}$  in volume.

**Figure S7.** Long-term stability of TMOS- $\text{TiO}_2$  coated glass sheet. The test of the water contact angles was carried out under ambient atmospheric condition every four days for a month. The water droplets were 4  $\mu\text{L}$  in volume.

**Figure S8.** Superhydrophilic patterns with different geometries and sizes filled with dye solutions on TMOS- $\text{TiO}_2$  coated substrates.

**Figure S9.** Water contact angles (CAs), advancing contact angles (ACAs) and receding contact angles (RCAs) as functions of positions on three unidirectional channels with the spacing  $p_0$  between two adjacent stripes of (a) 20  $\mu\text{m}$ , (b) 30  $\mu\text{m}$  and (c) 40  $\mu\text{m}$ .

**Figure S10.** Time-lapsed images of different concentrated liquid transport, bridging and draining: (a)  $V_{\text{water}}: V_{\text{ethanol}}=2:1$ ; (b)  $V_{\text{water}}: V_{\text{ethanol}}=4:1$ . The scale bar is 2 mm.

### Supplementary Analysis II:

**Figure S11.** Schematic illustration of drop motion

### Supplementary Analysis I:

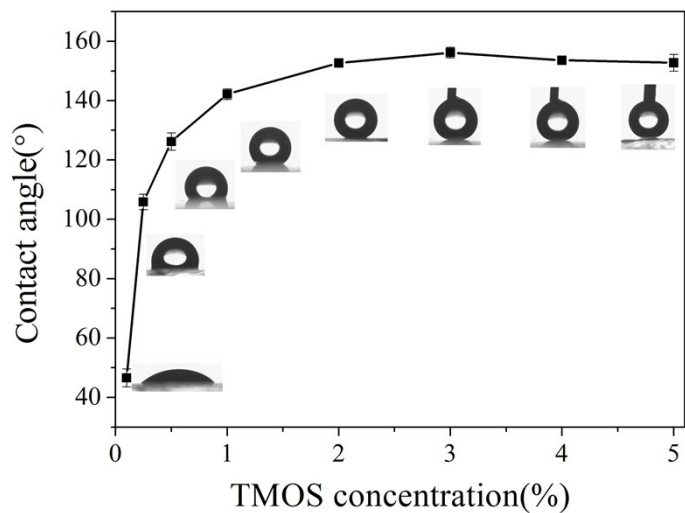

**Figure S1.** Effect of TMOS concentration on water contact angle on glass substrate.

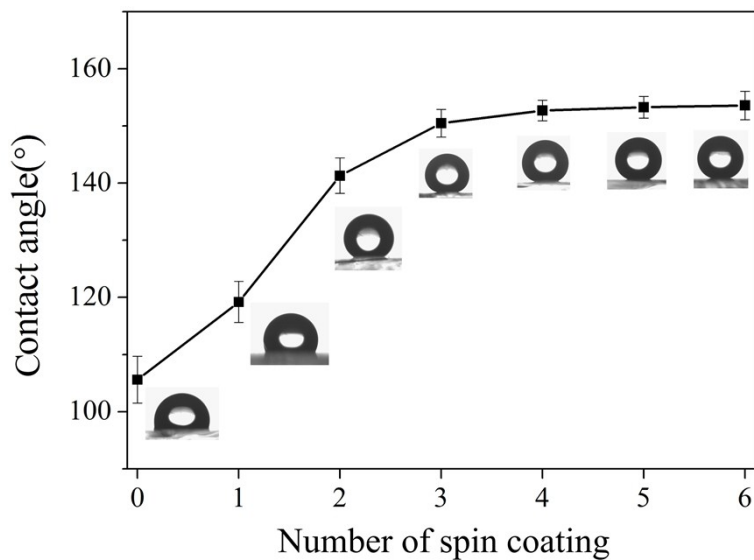

**Figure S2.** Effect of the number of spin coating on water contact angle on glass substrate.

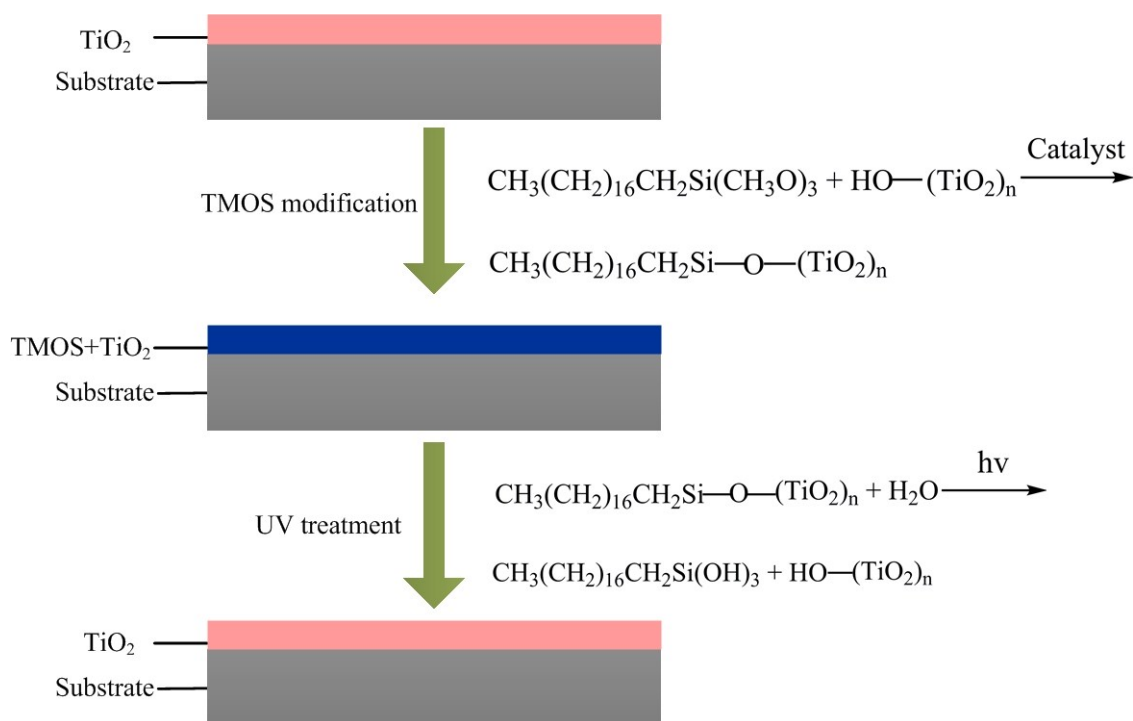

**Figure S3.** Reaction mechanism during the modification of  $\text{TiO}_2$  with TMOS before and after UV irradiation.

**Table S1.** XPS analysis of TMOS- $\text{TiO}_2$  coatings before and after UV irradiation for 30 minutes.

| Sample                             | Atomic concentration (at.%) |      |      |     |
|------------------------------------|-----------------------------|------|------|-----|
|                                    | O                           | Ti   | C    | Si  |
| TMOS- $\text{TiO}_2$               | 33.8                        | 11.0 | 49.3 | 5.9 |
| UV irradiated TMOS- $\text{TiO}_2$ | 61.8                        | 19.9 | 11.1 | 7.2 |

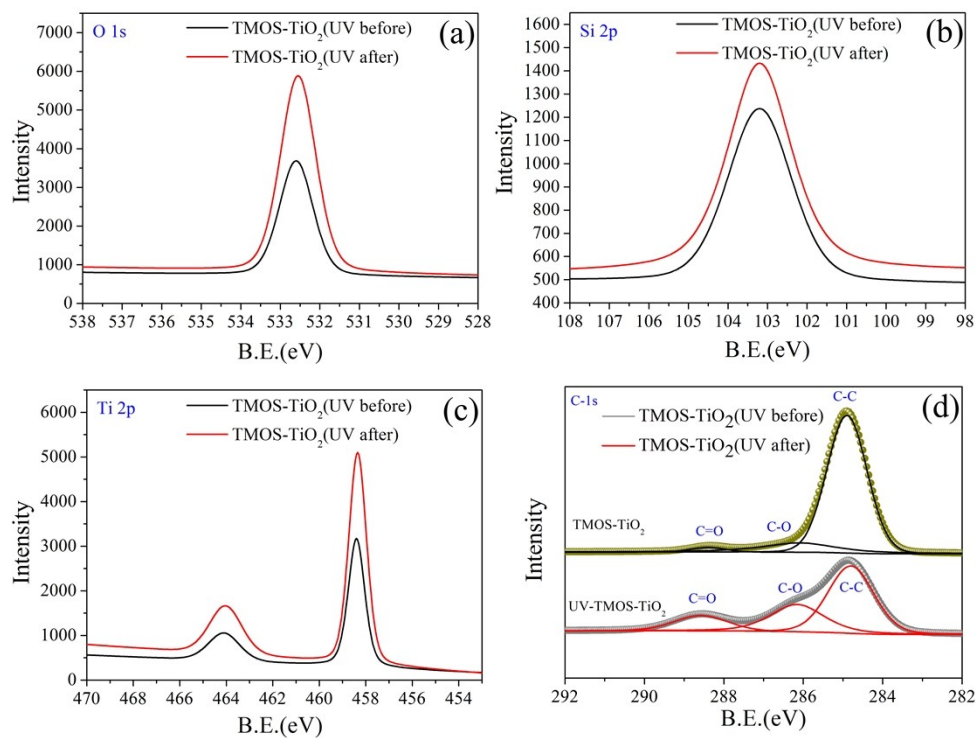

**Figure S4.** XPS spectra of (a) O 1s, (b) Si 2p, (c) Ti 2p and (d) C 1s for the TMOS-TiO<sub>2</sub> coatings before and after UV irradiation for 30 minutes.

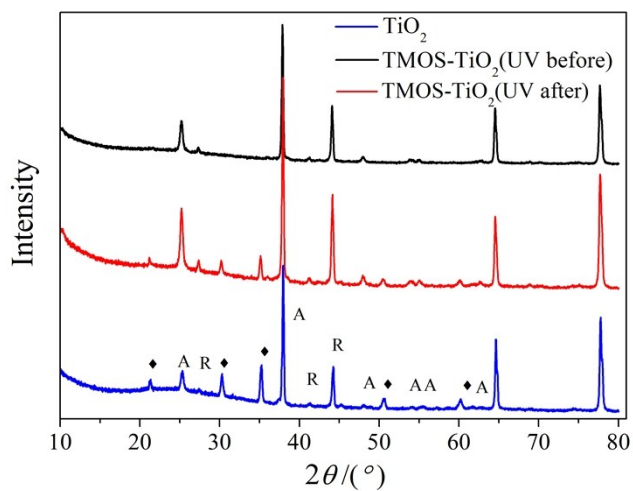

**Figure S5.** XRD patterns of TiO<sub>2</sub> and TMOS-TiO<sub>2</sub> coatings before and after UV irradiation for 30 minutes. (A: anatase; R: rutile).

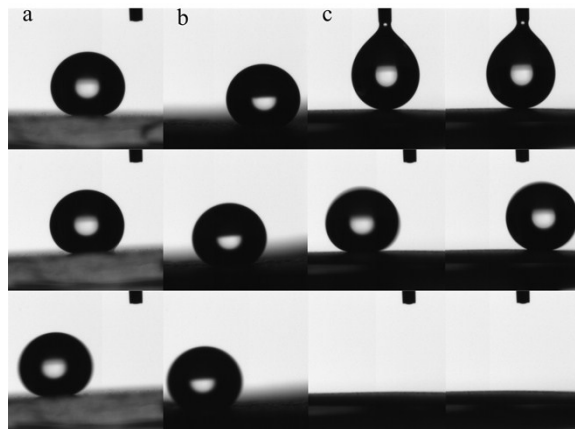

**Figure S6.** Sliding angles of a droplet on the TMOS-TiO<sub>2</sub> coated (a) glass sheet (3.0°) and (b) dustlessness cloth (2.9°). (c) The adhesion of a droplet on the TMOS-TiO<sub>2</sub> coated filter paper was lower than on the glass sheet and dustlessness cloth. The droplet could be hardly deposited on a specific area of the filter paper and easily roll away due to weak adhesion. The water droplets were 10 μL in volume.

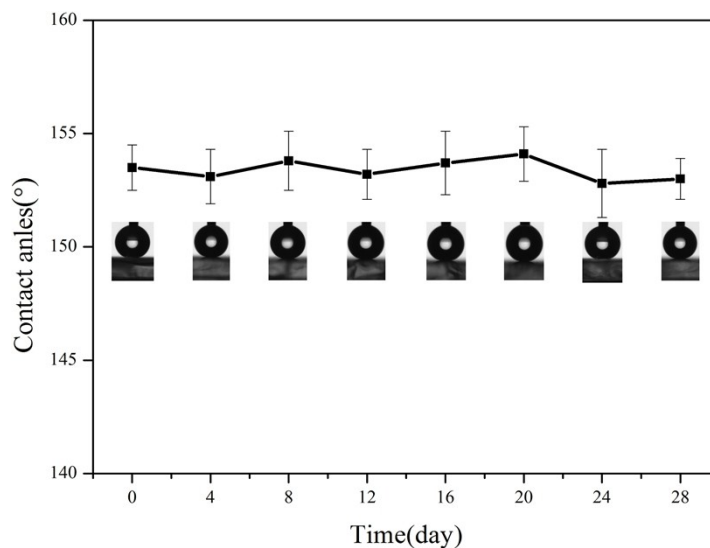

**Figure S7.** Long-term stability of TMOS-TiO<sub>2</sub> coated glass sheet. The test of the water contact angles was carried out under ambient atmospheric condition every four days for a month.

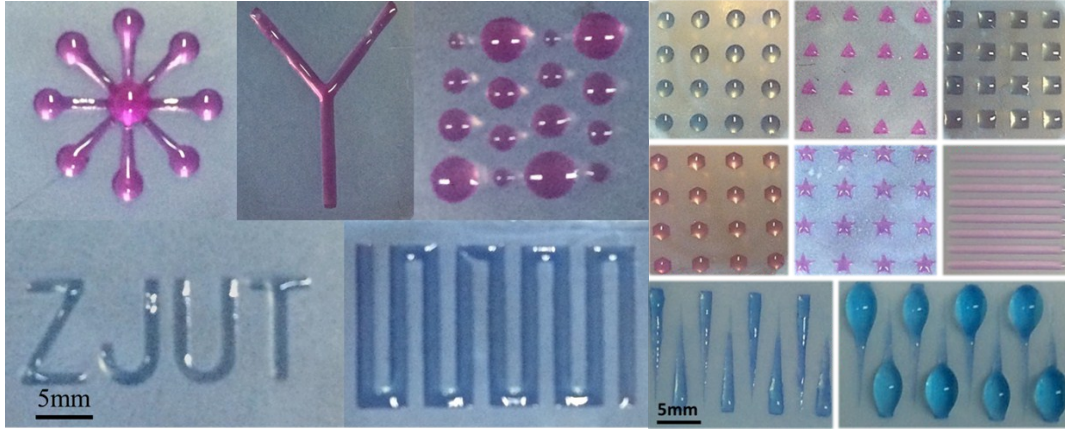

**Figure S8.** Superhydrophilic patterns with different geometries and sizes filled with dye solutions on TMOS–TiO<sub>2</sub> coated substrates.

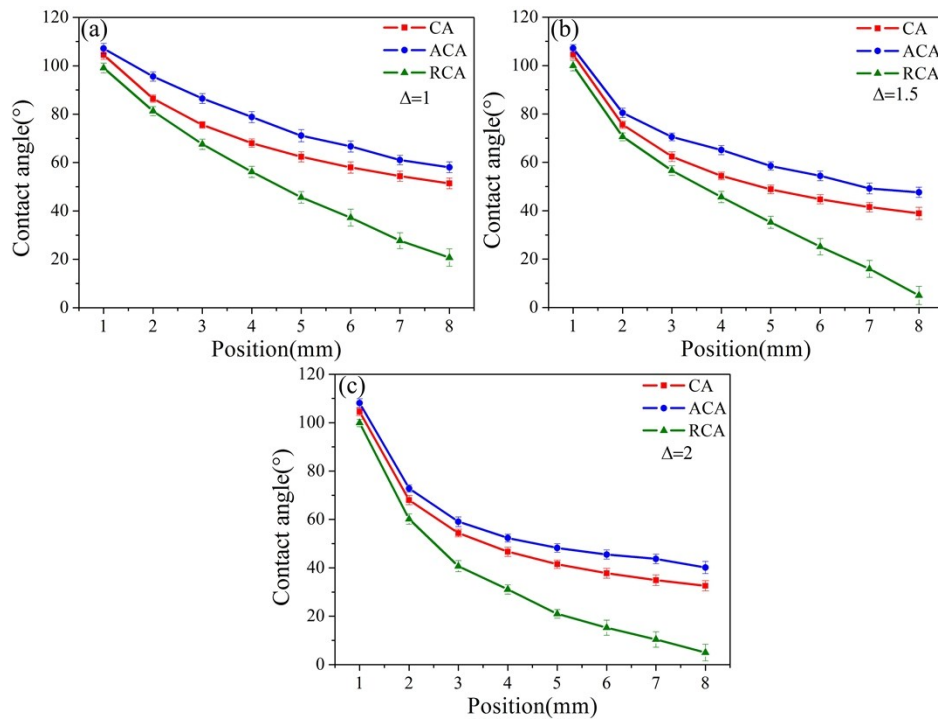

**Figure S9.** Water contact angles (CAs), advancing contact angles (ACAs) and receding contact angles (RCAs) as functions of positions on three unidirectional channels with the spacing  $P$  between two adjacent stripes of (a) 20  $\mu\text{m}$ , (b) 30  $\mu\text{m}$  and (c) 40  $\mu\text{m}$ .

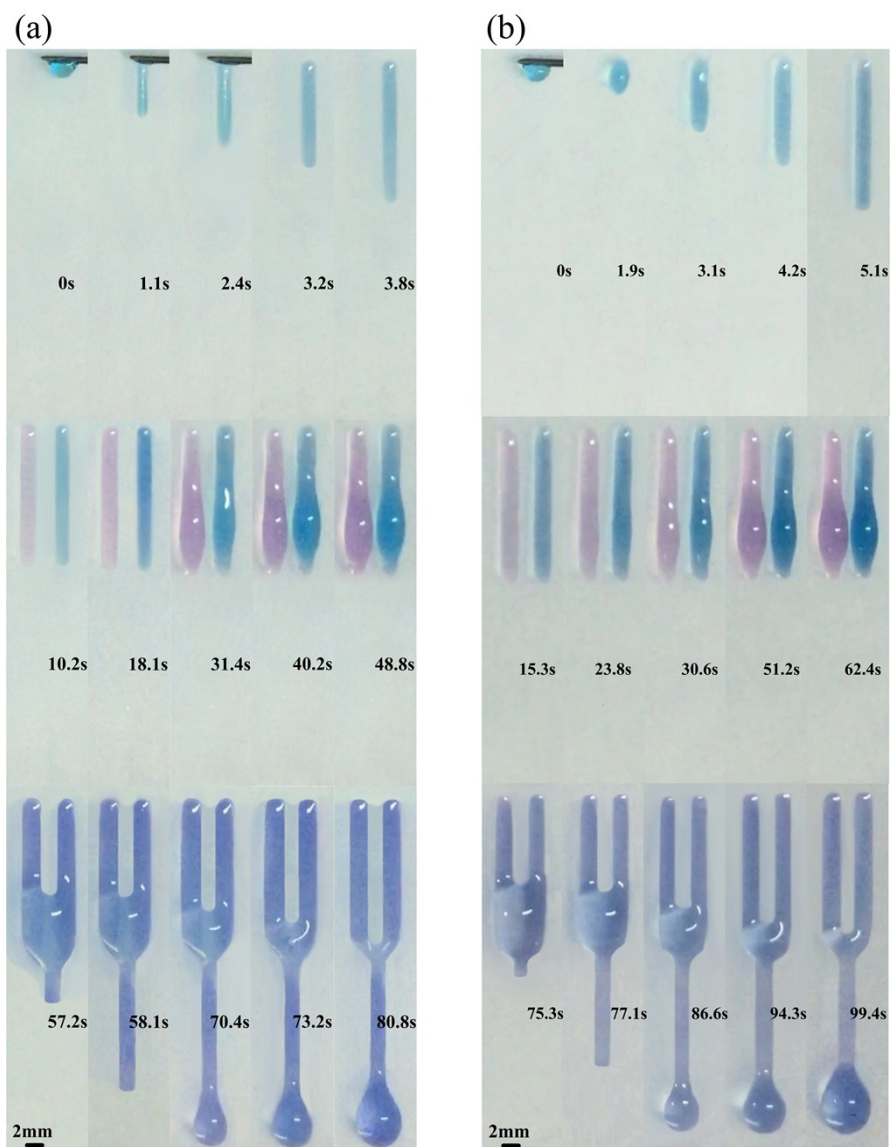

**Figure S10.** Time-lapsed images of different concentrated liquid transport, bridging and draining:

(a)  $V_{\text{water}}:V_{\text{ethanol}}=2:1$ ; (b)  $V_{\text{water}}:V_{\text{ethanol}}=4:1$ . The scale bar is 2 mm.



## Supplementary Analysis II:

### Droplet motion on wettability-patterned gradient surface

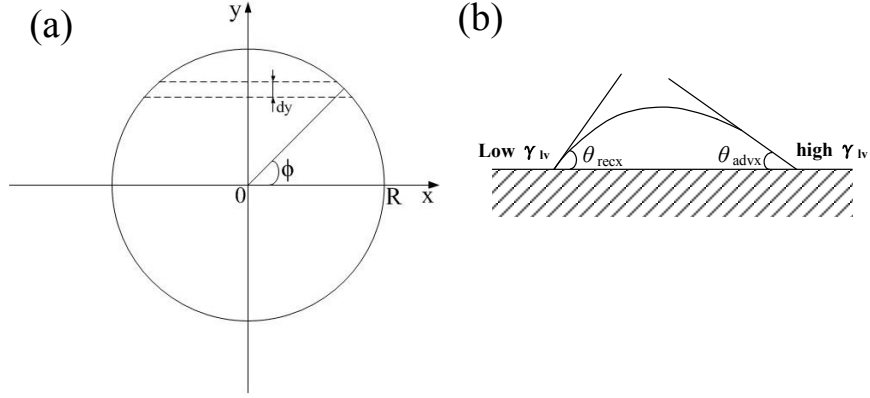

**Figure S11.** Schematic illustration of drop motion

As can be seen from Figure S11, for a thin strip of liquid thickness  $dy$  parallel to the spreading direction, the wettability gradient force ( $F_D$ ) at the  $k$  location which drives the droplet toward more wettable region of the surface can be described as<sup>33,37,38,78</sup>

$$\begin{aligned} F_D &= \gamma_{lv} \int_{-R}^R [(\gamma_{SV} - \gamma_{SL})_n - (\gamma_{SV} - \gamma_{SL})_0] dy \\ &= 2R \int_0^{\frac{\pi}{2}} [(\gamma_{SV} - \gamma_{SL})_n - (\gamma_{SV} - \gamma_{SL})_0] \cos \phi d\phi \end{aligned} \quad \text{S(1)}$$

According to the Young's equation,  $\gamma_{LV} = \frac{\gamma_{SV} - \gamma_{SL}}{\cos \theta}$ , the  $F_D$  can be rewritten as

$$\begin{aligned} F_D &= 2R \int_0^{\frac{\pi}{2}} \gamma_{LV} (\cos \theta_n - \cos \theta_0) \cos \phi d\phi \\ &= 2R \int_0^{\frac{\pi}{2}} \gamma_{LV} (\cos \theta_n - \cos \theta_{n-1} + \cos \theta_{n-1} - \cos \theta_{n-2} + \dots + \cos \theta_1 - \cos \theta_0) \cos \phi d\phi \\ &= 2R \gamma_{LV} \sum_{n=1}^k (\cos \theta_n - \cos \theta_{n-1}) \end{aligned} \quad \text{S(2)}$$

where  $R$  is the base radius of the droplet to contact surface in the  $x$  direction just before unidirectional spread, and  $\gamma_{LV}$  is the surface tension of droplet.  $\theta_n$  corresponds to the apparent

contact angle of droplet on the  $n^{\text{th}}$  wettability pattern of one channel. The similar technique based on Eq. (2) can be applied for the analysis of hysteresis force ( $F_H$ )

$$F_H = 2R\gamma_{lv} \sum_{n=1}^k \int_0^{\frac{\pi}{2}} (\cos \theta_{rn} - \cos \theta_{an}) \cos \phi d\phi = 2R\gamma_{lv} \sum_{n=1}^k (\cos \theta_{rn} - \cos \theta_{an}) \quad , \quad \text{S(3)}$$

where  $\theta_{an}$  and  $\theta_{rn}$  correspond to the advancing contact angle and the receding contact angle on the  $n^{\text{th}}$  wettability pattern of one channel.
